# Supplementary material for: Medium cut-off dialyzer improves erythropoiesis stimulating agent resistance in a hepcidin-independent manner in maintenance hemodialysis patients: results from a randomized controlled trial
Source: PubMed Central journal article supplement (PMC7524751; doi:10.1038/s41598-020-73124-x), 2020-09-29

**Medium cut-off dialyzer improves erythropoiesis stimulating agent resistance in a hepcidin-independent manner in maintenance hemodialysis patients: results from a randomized controlled trial**

Jeong-Hoon Lim<sup>1</sup>, Yena Jeon<sup>2</sup>, Ju-Min Yook<sup>1</sup>, Soon-Youn Choi<sup>1</sup>, Hee-Yeon Jung<sup>1</sup>, Ji-Young Choi<sup>1</sup>, Sun-Hee Park<sup>1</sup>, Chan-Duck Kim<sup>1</sup>, Yong-Lim Kim<sup>1</sup>, and Jang-Hee Cho<sup>1,\*</sup>

<sup>1</sup>Department of Internal Medicine, School of Medicine, Kyungpook National University, Daegu, South Korea

<sup>2</sup>Department of Statistics, Kyungpook National University, Daegu, South Korea

Supplementary Information Listing:

Supplementary Figure S1

\*Corresponding author: Jang-Hee Cho, MD, PhD

Associate Professor

Division of Nephrology, Department of Internal Medicine

Kyungpook National University Hospital, 130 Dongdeok-ro, Jung-gu, Daegu, 41944, Korea

Tel: +82-53-200-5550

Fax: +82-53-426-2046

Email: [jh-cho@knu.ac.kr](mailto:jh-cho@knu.ac.kr)

Supplementary Figure S1. CONSORT flow chart of patient inclusion.

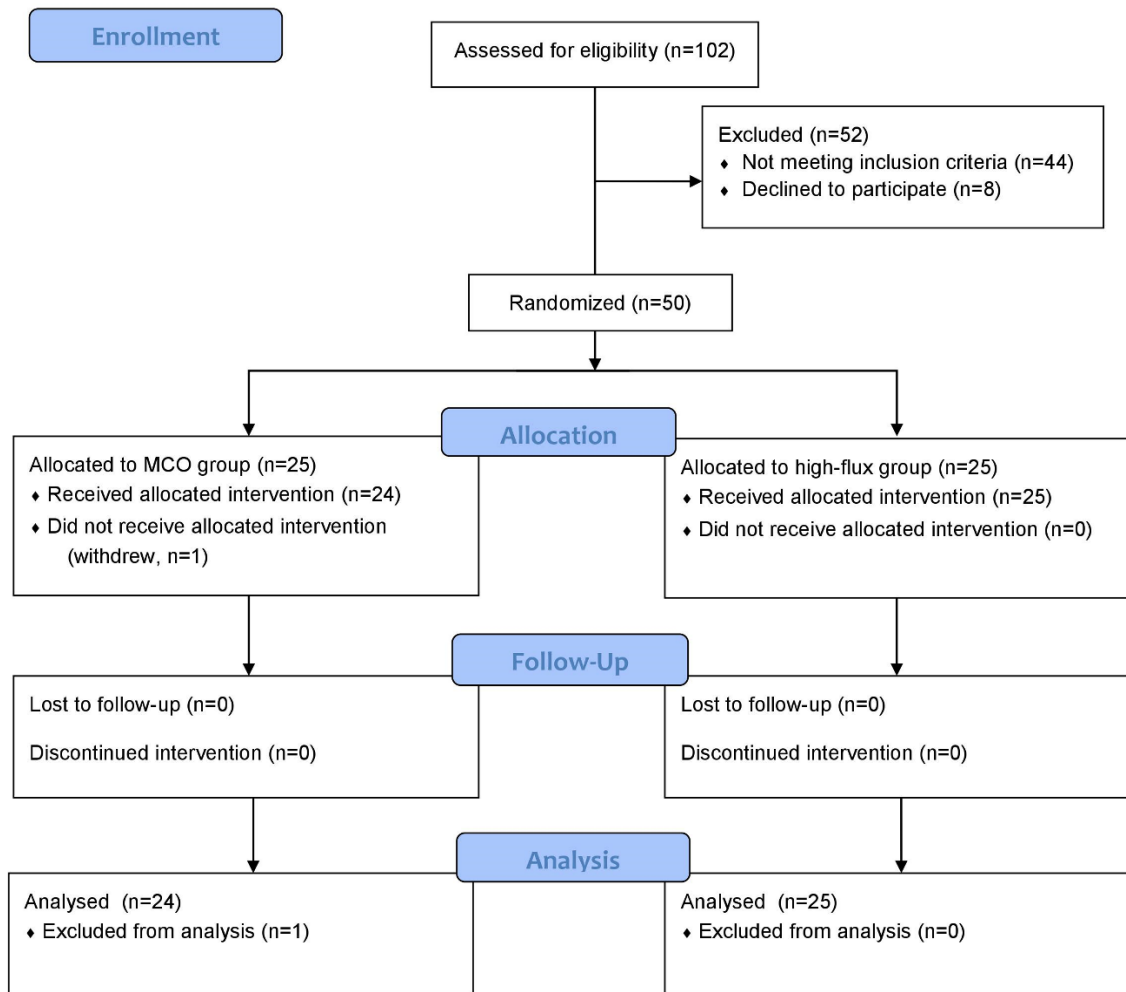

Supplement: 41598_2020_73124_MOESM1_ESM.pdf [file 41598_2020_73124_MOESM1_ESM.pdf]
